# Supplementary material for: From Late Miocene to Holocene: Processes of Differentiation within the Telestes Genus (Actinopterygii: Cyprinidae)
Source: PLoS One. 2012 Mar 29;7(3):e34423. doi: 10.1371/journal.pone.0034423 (PMC3315529; doi:10.1371/journal.pone.0034423)
Supplement: Supporting Information S5 — Genetic diversity and demographic parameters obtained from mtDNA and microsatellites data. (XLS) [file pone.0034423.s005.xls]

## Sheet: Supporting Information S5
Supporting Information S5. Genetic diversity and demographic parameters obtained from mtDNA and microsatellites data.
		mitochondrial DNA															Microsatellites
Taxa	Population or Group of populations samples	N	k	H	SD	θπ	SD	θk	θk lower	θk upper	θS	SD	DT	DT Pvalue	Fs	Fs Pvalue <0,02	N	An	SD	Ho	SD	He	SD	Ar	SD	Ap	SD	Recent bottleneck
Telestes alfiensis	GAL	4	4	1	0.1768	2.66667	2.12374	na	na	na	2.72727	1.78962	-0.21249	0.564	-1.41422	0.068	2	1.63636	1.02691	0.272727	0.4101	0.25758	0.38271	nd	-	-	-	nd
	GPI	1	1	1	0	0	0	na	na	na	0	0	0	1	0	na	1	1.27273	0.467099	0.272727	0.467099	0.27273	0.4671	nd	-	-	-	nd
Telestes pleurobipunctatus	GLB	23	9	0.7945	0.0651	1.95257	1.28035	4.95418	2.16073	11.0466	2.70943	1.1953	-0.94191	0.195	-2.97254	0.04	22	5.54545	4.9064	0.458677	0.367847	0.47386	0.37641	4.38505	1.04439	-	-	ns
	GLO	9	2	0.5	0.1283	1	0.83887	0.45466	0.10275	1.91828	0.73587	0.56316	1.23476	0.897	2.07944	0.807	9	2.45455	1.4397	0.393939	0.401736	0.33393	0.31802	nd	-	-	-	ns
Telestes montenigrinus	POD	30	11	0.8437	0.0466	4.26897	2.42161	5.81089	2.7489	11.9551	4.54356	1.72102	-0.20816	0.494	-0.85976	0.377	31	6.81818	4.28528	0.530792	0.297532	0.56084	0.2899	4.7666	0.832277	-	-	ns
Telestes muticellus	BEV	29	2	0.2956	0.093	28.9655	14.5188	0.28169	0.06599	1.1098	24.9544	8.03809	0.61718	0.773	36.7368	1	29	2.45455	0.934199	0.213167	0.238315	0.25331	0.24965	1.92108	0.199864	0.488194	0.119856	ns
	CAR	29	13	0.9089	0.0323	4.74877	2.66153	8.48245	4.10953	17.2611	7.38445	2.61851	-1.29434	0.097	-2.04383	0.209	25	7.09091	3.83287	0.603636	0.255784	0.61796	0.24553	5.29516	0.748033	2.07046	0.481856	ns
	VIC	27	4	0.6581	0.0566	1.7208	1.1529	1.04795	0.35149	2.84605	1.29721	0.68408	0.91589	0.841	1.78204	0.85	24	5.27273	2.93567	0.526515	0.248098	0.58245	0.2636	4.38862	0.691745	1.06648	0.262668	ns
Telestes souffia agassii 3	INN	28	1	0	0	0	0	0	0	0	0	0	0	1	0	na	30	4.63636	2.24823	0.745455	0.330075	0.59332	0.26248	3.67728	0.47898	1.32578	0.284983	yes
Telestes souffia agassii 2	Tisza basin	45	13	0.6091	0.084	1.35152	0.94655	5.76607	2.95738	10.896	3.88774	1.41483	-2.07277	0.003	-7.96516	0	30	9.364	7.839	0.493938	0.323803	0.53914	0.36735	5.72439	1.20316	2.73154	0.779028	nd
	TIZ	21	9	0.7238	0.1011	1.81905	1.217	5.42322	2.32824	12.3556	3.33543	1.4306	-1.61162	0.035	-3.55918	0.013	15	7.27273	5.64076	0.478788	0.327711	0.53501	0.37507	(5,00)	(1,02)	-	-	ns
	VIS	24	6	0.4964	0.1187	0.89493	0.72019	2.23618	0.87488	5.38214	2.4101	1.08514	-2.06057	0.005	-2.30953	0.024	15	6.90909	5.26222	0.509092	0.353112	0.54504	0.3635	(4,88)	(0,96)	-	-	ns
Telestes souffia agassii 1	BRN	31	6	0.7269	0.0502	2.67097	1.6266	1.93655	0.77221	4.53731	2.00251	0.90729	1.0064	0.851	1.39508	0.777	28	6.63636	5.1434	0.490259	0.201455	0.54545	0.2409	4.6497	0.908787	1.79691	0.444493	ns
	SLO	38	6	0.4979	0.0833	1.08393	0.81031	1.75499	0.708	4.04549	1.66604	0.77221	-0.97819	0.171	-1.10688	0.255	37	6.81818	3.73679	0.520885	0.259823	0.60213	0.29416	4.7286	0.703714	1.81236	0.435437	ns
Telestes souffia souffia	Northern Rhone basin	89	11	0.678	0.0436	1.12921	0.821504	3.09034	1.57778	5.7614	2.56906	0.934384	-1.5363	0.044	-4.61959	0.03	70	11.636	9.416	0.579221	0.304347	0.61057	0.31586	5.66811	0.920039	0.75833	0.313973	nd
	SEI	26	3	0.5138	0.0849	1.08923	0.82346	0.64526	0.18767	1.99157	0.78617	0.49694	0.94596	0.817	1.70283	0.829	23	6.36364	4.15386	0.565217	0.309888	0.58287	0.31177	4.8373	0.765035	-	-	ns
	DOU	33	7	0.5985	0.0842	0.95833	0.74621	2.42368	1.02358	5.40958	1.97117	0.88833	-1.52736	0.049	-2.73708	0.039	23	7.54545	5.18389	0.624507	0.343601	0.60141	0.31404	5.34206	0.924235	-	-	ns
	SAO	30	3	0.4391	0.097	0.47356	0.47137	0.61185	0.17879	1.87367	0.50484	0.37322	-0.1269	0.427	-0.04375	0.371	24	6.27273	4.24478	0.549243	0.315028	0.5594	0.31789	4.62998	0.789509	-	-	ns
	AIN	29	6	0.798	0.0405	1.25616	0.90864	2.00567	0.79625	4.72854	1.27318	0.66841	-0.0368	0.516	-1.01839	0.275	28	9.72727	6.92952	0.616882	0.32423	0.63985	0.32807	6.40745	1.0162	0.785909	0.337933	ns
	Upper Rhone	65	13	0.7577	0.0387	2.86538	1.69347	4.61029	2.42689	8.42989	4.00515	1.36759	-0.86675	0.196	-1.96356	0.212	57	9.455	7.764	0.559811	0.305834	0.60454	0.31401	5.2015	0.908612	0.544885	0.288168	nd
	FIL	31	4	0.5097	0.0911	2.68387	1.63305	0.98874	0.33369	2.6599	2.00251	0.90729	1.02583	0.89	3.7046	0.945	33	5	3.34664	0.534434	0.28078	0.55563	0.28712	3.98435	0.647656	-	-	ns
	USS	34	12	0.8396	0.0477	2.77005	1.67104	6.17457	3.02234	12.2798	4.40227	1.63985	-1.24684	0.09	-3.16248	0.069	24	8.36364	5.73189	0.594696	0.358473	0.62766	0.33078	6.07236	1.0706	-	-	ns
	Ardeche basin	89	12	0.6711	0.0424	1.9811	1.25208	3.51513	1.83868	6.4223	3.16192	1.08948	-1.06123	0.151	-2.42687	0.184	88	12.636	11.156	0.640495	0.334341	0.6653	0.34117	6.64012	1.15013	0.952818	0.314728	nd
	ARD	20	7	0.7632	0.079	2.58421	1.6137	3.39085	1.36341	8.10223	3.10057	1.36241	-0.59064	0.327	-0.43461	0.387	20	8.36364	5.12392	0.636364	0.333235	0.66119	0.33722	6.42351	1.05792	-	-	ns
	BA2	30	5	0.6092	0.0869	2.10805	1.34543	1.45318	0.53936	3.61383	1.76694	0.83375	0.57039	0.732	1.49616	0.788	29	9	6.57267	0.658306	0.350794	0.66183	0.33803	6.28748	1.03789	-	-	ns
	ROS	39	9	0.664	0.0558	1.57895	1.06692	3.36006	1.55153	6.93879	2.60176	1.06134	-1.19878	0.109	-2.56308	0.104	39	10.0909	7.71304	0.629372	0.33439	0.64993	0.33308	6.36283	1.06772	-	-	ns
	SOR	30	7	0.5494	0.1034	0.94023	0.73872	2.55821	1.07286	5.76509	1.51452	0.74849	-1.08206	0.14	-2.96804	0.025	29	9.36364	6.40738	0.598746	0.327595	0.63515	0.34127	6.27039	1.05264	0.686339	0.278185	ns
	Durance basin	220	45	0.771	0.0263	1.58688	1.04811	15.699	10.9506	22.1951	7.5395	1.9261	-2.30789	0.001	-27.7535	0	196	16.364	13.299	0.654917	0.329746	0.6665	0.33459	6.61044	1.00157	0.603652	0.199171	nd
	ARC	30	9	0.7471	0.0695	1.30345	0.93238	3.98239	1.79732	8.47852	2.77662	1.16333	-1.70753	0.024	-4.02819	0.009	29	9.54545	5.27946	0.692788	0.352822	0.66205	0.33069	6.28569	0.888938	-	-	ns
	ASS	39	12	0.7476	0.0523	1.24426	0.89411	5.53991	2.75349	10.8004	3.07481	1.20501	-1.86627	0.011	-7.64823	0	28	9.27273	5.51527	0.636365	0.324516	0.65573	0.33303	6.43421	1.01294	-	-	ns
	FAU	29	8	0.7192	0.071	1.66502	1.12116	3.29893	1.43676	7.23078	2.801	1.17786	-1.31495	0.08	-2.00107	0.125	28	9.72727	5.71123	0.652597	0.332389	0.65602	0.3329	6.35121	0.959736	-	-	ns
	JAB	22	10	0.7879	0.0843	1.45887	1.02649	6.49168	2.86417	14.4734	2.74321	1.21643	-1.5966	0.042	-5.87592	0	21	9.27273	5.47889	0.670994	0.341035	0.671	0.33811	6.74837	1.0118	-	-	ns
	LAR	43	14	0.8749	0.0292	2.48173	1.51748	6.81509	3.53527	12.7955	4.85354	1.70587	-1.60573	0.038	-4.9586	0.014	42	10.0909	7.1057	0.66883	0.338305	0.66414	0.33456	6.27162	0.989399	-	-	ns
	MAN	22	13	0.8052	0.0892	1.61039	1.10583	12.4593	5.61158	27.9273	4.11482	1.68094	-2.19449	0.002	-10.6224	0	20	9	6.01664	0.622727	0.326622	0.65256	0.33341	6.58011	1.07748	-	-	ns
	STA	35	9	0.6034	0.0952	0.95126	0.74106	3.58862	1.64308	7.49462	2.67106	1.10129	-2.00612	0.004	-5.20767	0	28	8.72727	4.75586	0.626624	0.315567	0.65567	0.32738	6.10627	0.875483	-	-	ns
	BES	23	4	0.6838	0.0659	1.5336	1.06345	1.12759	0.37506	3.10188	1.35471	0.72209	0.38737	0.688	1.22521	0.752	23	6.09091	3.36019	0.604744	0.325625	0.6231	0.32472	5.12396	0.760069	0.229737	0.0949846	yes
	VAR	67	4	0.2095	0.0875	0.80416	0.65141	0.75863	0.26211	1.96927	1.46614	0.65577	-1.13123	0.127	0.52838	0.632	65	7.90909	6.31593	0.434964	0.26254	0.47378	0.27893	4.05516	0.663924	0.464794	0.202836	ns
	HER	33	1	0	0	0	0	0	0	0	0	0	0	1	0	na	33	5.36364	3.50065	0.548211	0.30498	0.56253	0.29551	3.99445	0.5932	0.370646	0.248424	ns
	VID	31	1	0	0	0	0	0	0	0	0	0	0	1	0	na	30	3.36364	1.74773	0.40909	0.265452	0.41376	0.2669	2.76934	0.368177	0.0397078	0.0292146	ns
na	not available
nd	not determined
ns	non significant
